# Supplementary material for: Aggregation-induced emission and reversible mechanoresponsive behavior of boryl substituted phenothiazine
Source: Royal Society of Chemistry journal article supplement (doi:10.1039/d3nj04283a), 2023-01-01
Supplement: d3nj04283a1.pdf [file d3nj04283a1.pdf]

## Supporting Information

*for*

### **Aggregation-induced emission and reversible mechanoresponsive behavior of boryl substituted phenothiazine**

Weidong Zhang,\* Juanfang Zhou, Chao Zhang, and Xinliang Liu\*

School of Chemical Engineering, Qinghai University, Xining, 810016, China

E-mail address: zhangwd@qhu.edu.cn, and liuxl1219@163.com

#### **Contents**

|                                                                 |           |
|-----------------------------------------------------------------|-----------|
| <b>1. The excitation and emission spectra .....</b>             | <b>2</b>  |
| <b>2. Electrochemical properties .....</b>                      | <b>6</b>  |
| <b>3. Comparison of HOMO/LUMO plots .....</b>                   | <b>7</b>  |
| <b>4. Single-crystal X-ray structure determination .....</b>    | <b>9</b>  |
| <b>5. <sup>1</sup>H NMR and <sup>13</sup>C NMR spectra.....</b> | <b>14</b> |
| <b>6. Reference .....</b>                                       | <b>17</b> |

## 1. The excitation and emission spectra

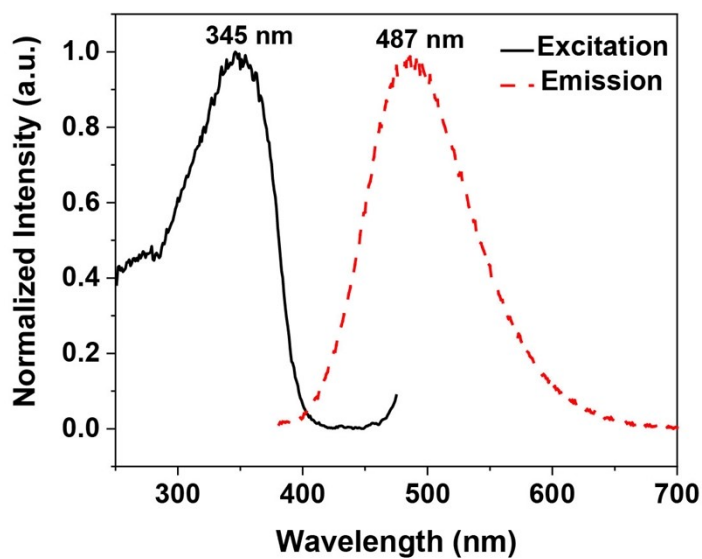

**Figure S1.** Fluorescence excitation (solid line) and emission spectra (dashed line) of **4a**.

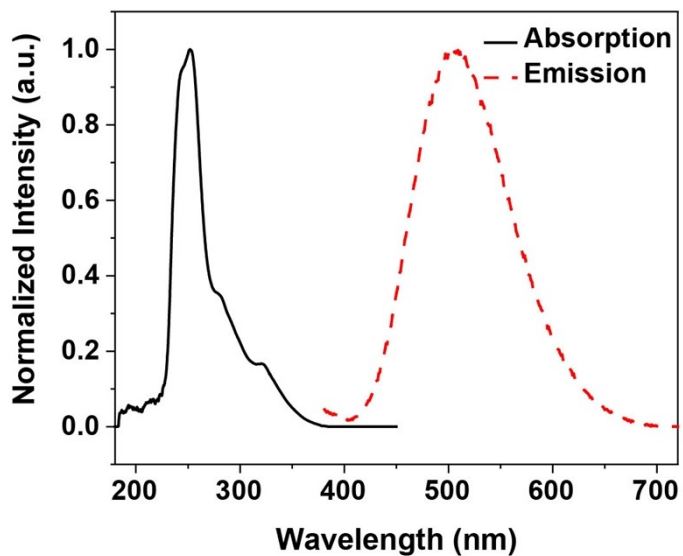

**Figure S2.** Fluorescence excitation (solid line) and emission spectra (dashed line) of **4b**.

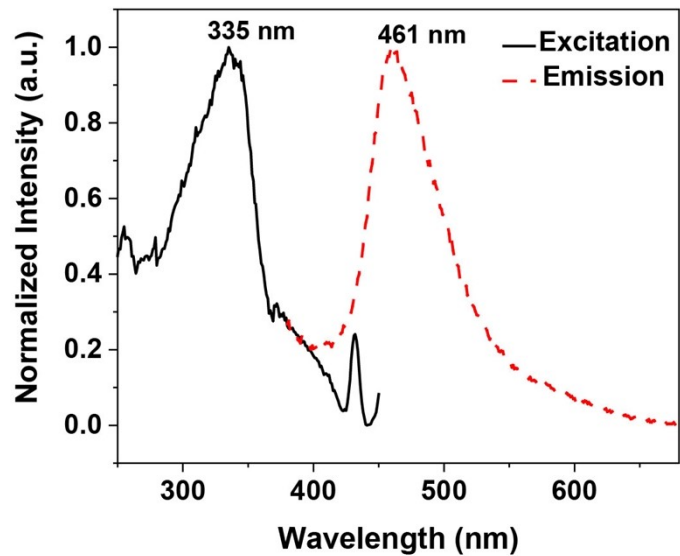

**Figure S3.** Fluorescence excitation (solid line) and emission spectra (dashed line) of **4c**.

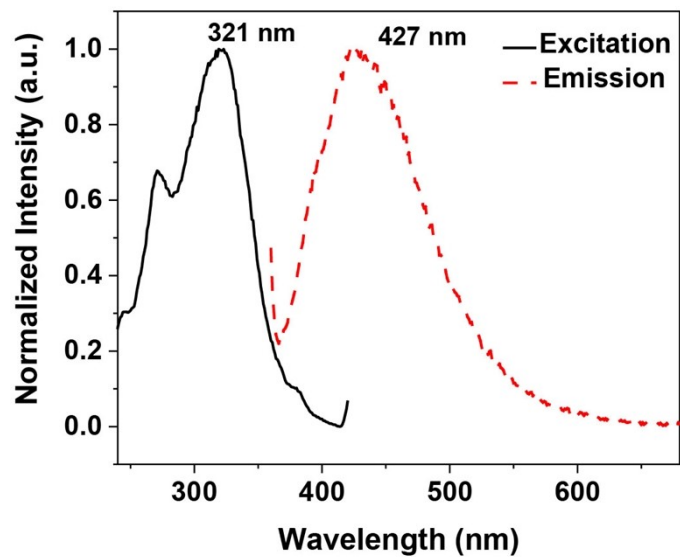

**Figure S4.** Fluorescence excitation (solid line) and emission spectra (dashed line) of **4d**.

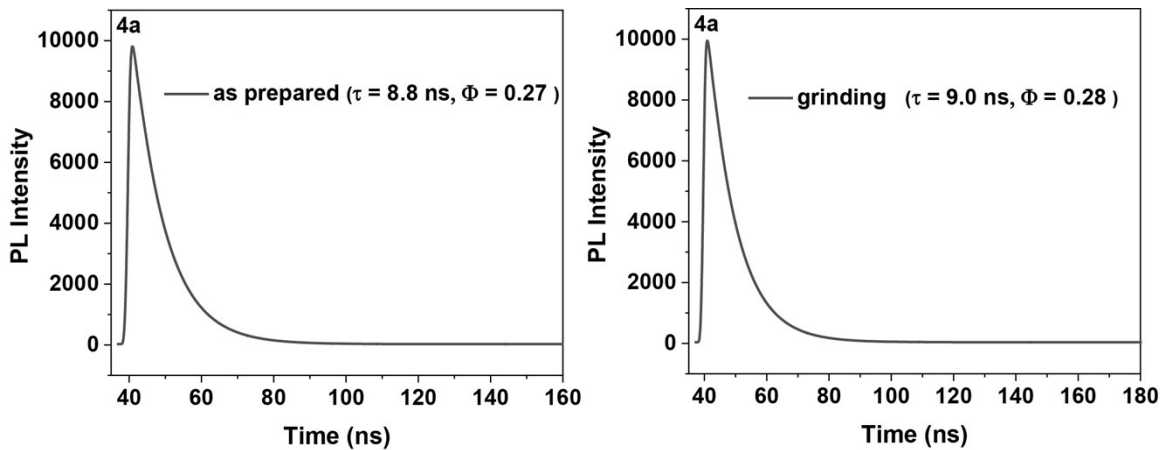

**Figure S5.** Time-resolved fluorescence spectra of as-prepared and grinding of **4a**.

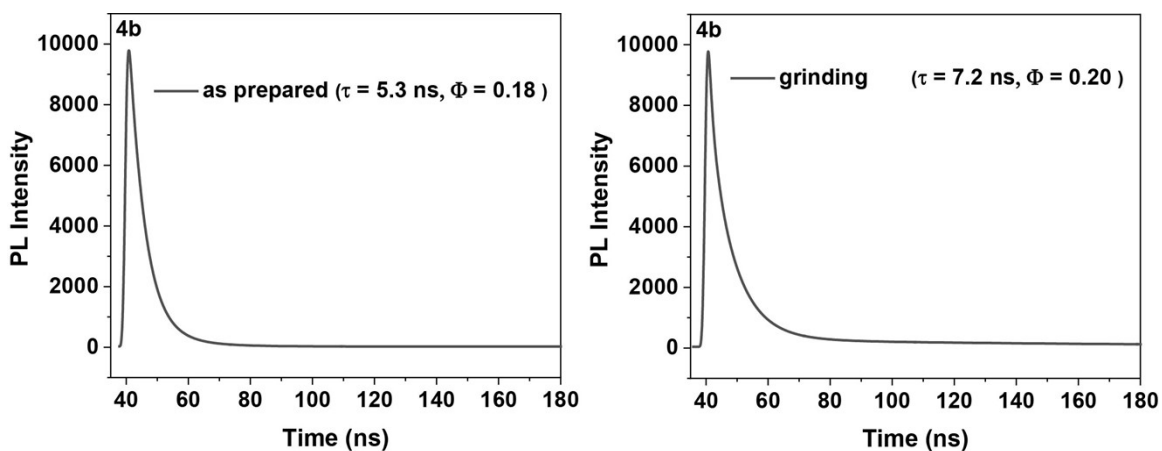

**Figure S6.** Time-resolved fluorescence spectra of as-prepared and grinding of **4b**.

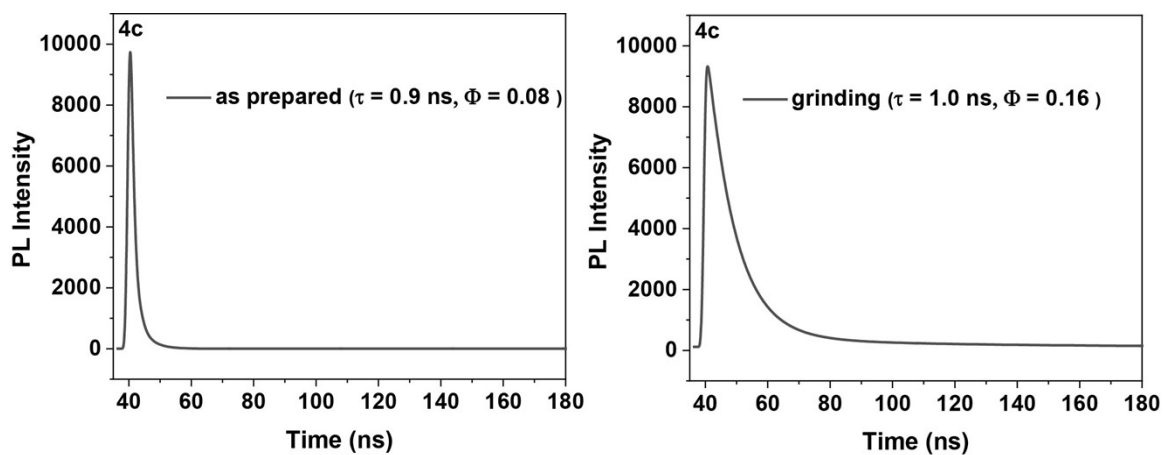

**Figure S7.** Time-resolved fluorescence spectra of as-prepared and grinding of **4c**.

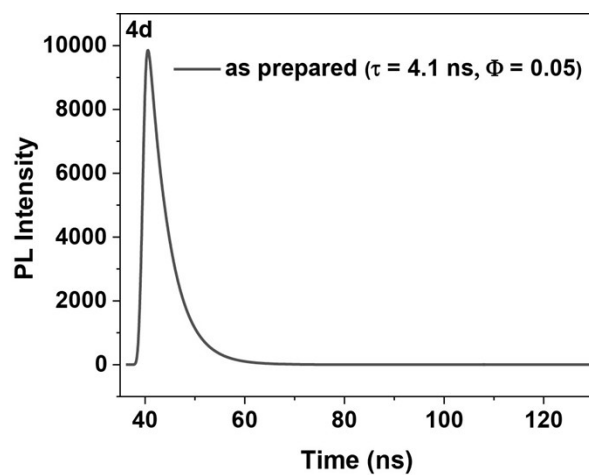

**Figure S8.** Time-resolved fluorescence spectra of as-prepared of **4d**.

## 2. Electrochemical properties

Cyclic voltammograms were recorded with a Metrohm PGSTAT204 electrochemical analyzer using DCM. The CV cell consisted of a gold electrode, a Pt wire counter electrode, and an Ag/AgCl reference electrode. All measurements were performed using DCM solutions of samples with a concentration of 1 mM and 0.1 M  $\text{Bu}_4\text{N}^+\text{BF}_6^-$  as a supporting electrolyte with a scan rate of  $100 \text{ mVs}^{-1}$ . Potentials are determined against a ferrocene/ferrocenyl ion couple ( $\text{Fc}/\text{Fc}^+$ ).

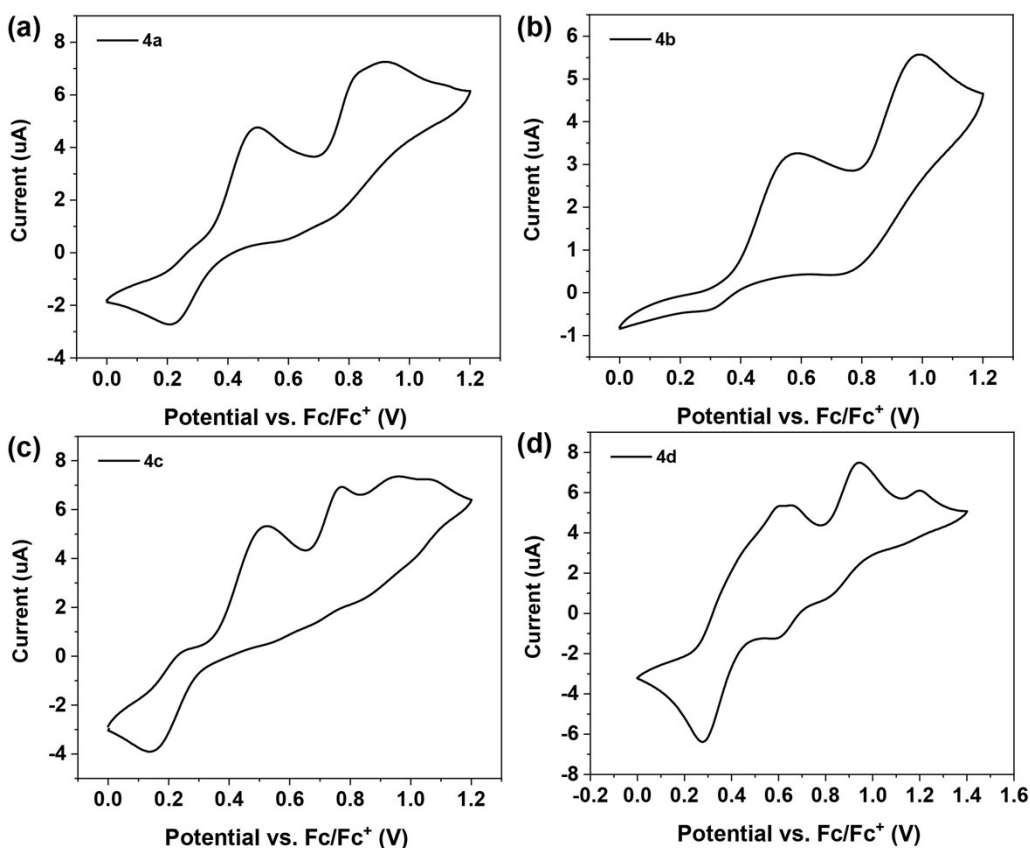

**Figure S9.** Cyclic voltammograms of **4a**, **4b**, **4c** and **4d** in DCM with  $\text{Bu}_4\text{N}^+\text{BF}_6^-$  (0.1 M) as a supporting electrolyte, Fc = ferrocene.

### 3. Comparison of HOMO/LUMO plots

Table S1 Electronic properties of **4a**, **4b**, **4c** and **4d**

| Entry     | $E_g^a$ (eV) | $E_{ox}^b$ (V) | HOMO(eV)<br>(Exp) <sup>c</sup> | LUMO(eV)<br>(Exp) <sup>d</sup> | HOMO(eV)<br>(Cal) <sup>e</sup> | LUMO(eV)<br>(Cal) <sup>e</sup> | $E_g$ (eV)<br>(Cal) <sup>e</sup> |
|-----------|--------------|----------------|--------------------------------|--------------------------------|--------------------------------|--------------------------------|----------------------------------|
| <b>4a</b> | 3.85         | 0.37           | -5.17                          | -1.32                          | -5.74                          | -0.96                          | 4.78                             |
| <b>4b</b> | 3.62         | 0.35           | -5.15                          | -1.53                          | -5.56                          | -1.12                          | 4.44                             |
| <b>4c</b> | 3.82         | 0.36           | -5.16                          | -1.34                          | -5.67                          | -1.24                          | 4.43                             |
| <b>4d</b> | 3.66,        | 0.27           | -5.07                          | -1.41                          | -5.52                          | -0.84                          | 4.68                             |

<sup>a</sup>  $E_g$  estimated from the UV-Vis absorption spectra.

<sup>b</sup> Oxidation onset potentials measured by cyclic voltammetry.

<sup>c</sup> HOMO =  $-(E_{OX} + 4.8)$  eV.

<sup>d</sup> LUMO = HOMO +  $E_g$ .

<sup>e</sup>Theoretical calculations have been carried out by using the GAUSSIAN09 suite of programs in gas-phase at the B3LYP/6-31G(d) level [1], respectively.

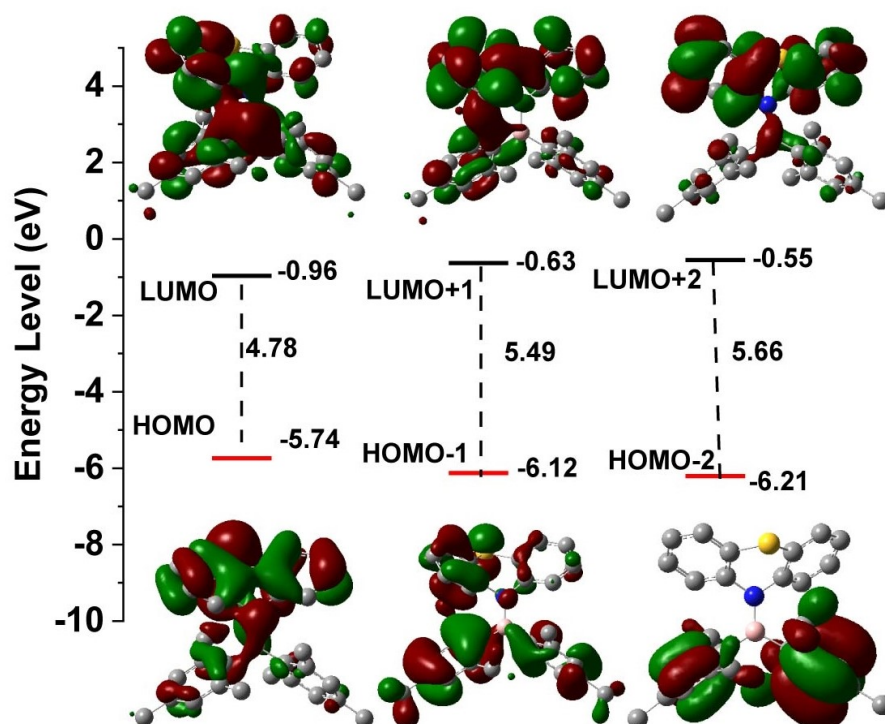

Figure S10. Computed molecular orbital plots for **4a**.

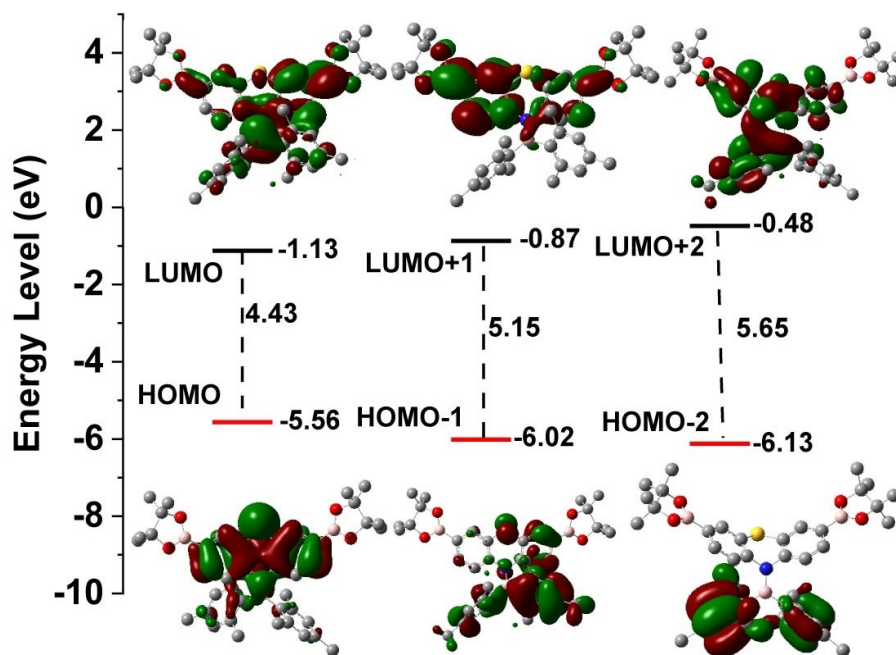

Figure S11. Computed molecular orbital plots for **4b**.

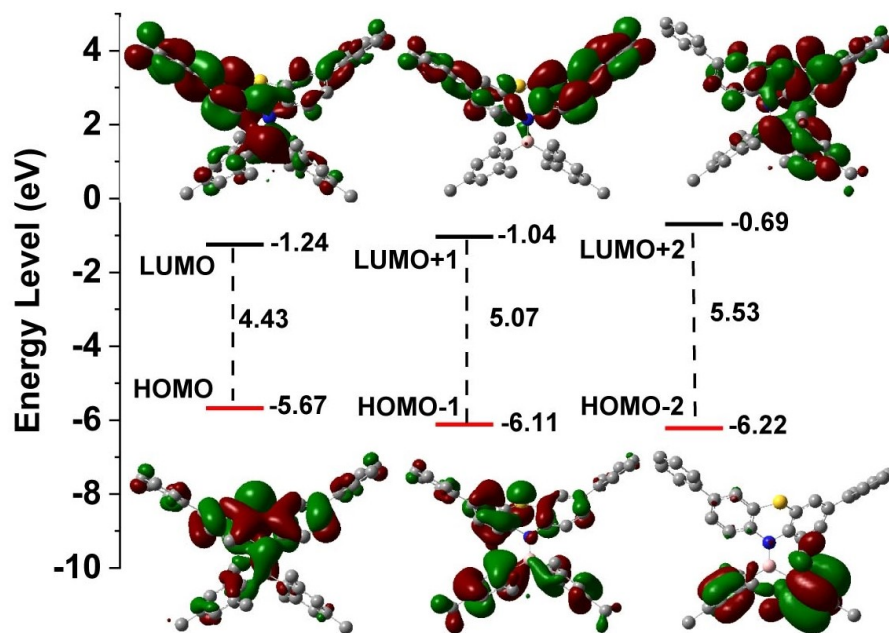

Figure S12. Computed molecular orbital plots for **4c**.



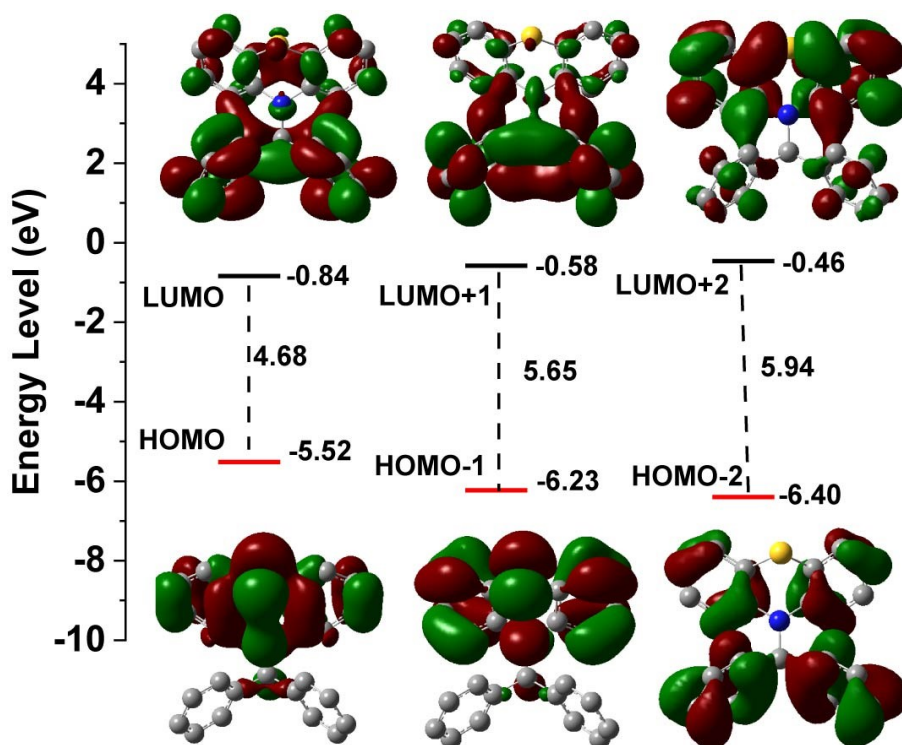

Figure S13. Computed molecular orbital plots for **4d**.

#### 4. Single-crystal X-ray structure determination

**X-ray Crystallography.** Crystals of appropriate quality for X-ray diffraction studies were removed from a vial (in a glove box) and immediately covered with a thin layer of hydrocarbon oil (Paratone-N). A suitable crystal was then selected, attached to a glass fiber, and quickly placed in a glass vial. All data were collected using a Bruker APEX II CCD detector/D8 diffractometer using Mo/Cu  $K\alpha$  radiation. The data were corrected for absorption through Gaussian integration from indexing of the crystal faces. Structures were solved using the direct methods programs SHELXS-97, and refinements were completed using the program SHELXL-97.<sup>[8]</sup>

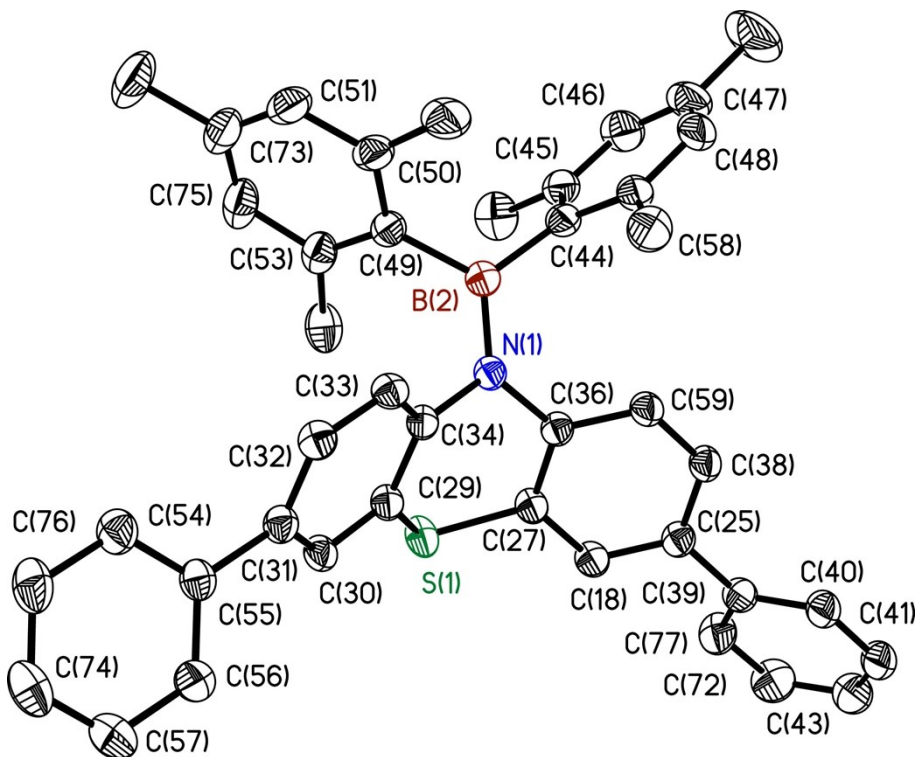

**Figure S14.** Molecular Structure of **4c** (CCDC 2195211) with thermal ellipsoids presented at a 50% probability level. All hydrogen atoms have been omitted for clarity. Selected bond lengths (Å): C(34)—N(1), 1.445(2); C(36)—N(1), 1.450(2); N(1)—B(2), 1.431(3); C(49)—B(2), 1.605(3); C(44)—B(2), 1.598(3); C(27)—S(1), 1.761(2); C(29)—S(1), 1.760(2); C(31)—C(55), 1.491(3); C(25)—C(39), 1.486(3); Bond angles (deg): B(2)—N(1)—C(34), 120.64(16); B(2)—N(1)—C(36), 125.69(16); C(34)—N(1)—C(36), 113.60(15); C(44)—B(2)—C(49), 117.04(17); N(1)—B(2)—C(44), 122.80(18); N(1)—B(2)—C(49), 120.11(18); C(44)—B(2)—C(49), 117.04(17); C(29)—S(1)—C(27), 97.01(9).

**Table S2.** Crystallographic experimental details for compound **4c** (CCDC 2195211).

|                                   |                                             |                        |
|-----------------------------------|---------------------------------------------|------------------------|
| Empirical formula                 | C <sub>42</sub> H <sub>38</sub> BNS         |                        |
| Formula weight                    | 599.6                                       |                        |
| Temperature                       | 293(2) K                                    |                        |
| Wavelength                        | 1.54184 Å                                   |                        |
| Crystal system, space group       | Monoclinic, P 21/n                          |                        |
| Unit cell dimensions              | a = 13.5233(4) Å                            | alpha = 90.000(2) deg. |
|                                   | b = 16.5378(4) Å                            | beta = 100.155(2) deg. |
|                                   | c = 30.5504(7) Å                            | gamma = 90.000(2) deg. |
| Volume                            | 6725.5(3) Å <sup>3</sup>                    |                        |
| Z, Calculated density             | 8, 1.184 Mg/m <sup>3</sup>                  |                        |
| Absorption coefficient            | 1.069 mm <sup>-1</sup>                      |                        |
| F(000)                            | 2544                                        |                        |
| Crystal size                      | ? x ? x ? mm                                |                        |
| Theta range for data collection   | 2.939 to 68.209 deg.                        |                        |
| Limiting indices                  | -16<=h<=16, -19<=k<=14, -36<=l<=36          |                        |
| Reflections collected / unique    | 74535 / 12232 [R(int) = 0.0676]             |                        |
| Completeness to theta = 67.684    | 99.90%                                      |                        |
| Absorption correction             | None                                        |                        |
| Refinement method                 | Full-matrix least-squares on F <sup>2</sup> |                        |
| Data / restraints / parameters    | 12232 / 0 / 812                             |                        |
| Goodness-of-fit on F <sup>2</sup> | 1.015                                       |                        |
| Final R indices [I>2sigma(I)]     | R1 = 0.0548, wR2 = 0.1687                   |                        |
| R indices (all data)              | R1 = 0.0663, wR2 = 0.1825                   |                        |
| Extinction coefficient            | 0.00172(13)                                 |                        |
| Largest diff. peak and hole       | 0.337 and -0.307 e.Å <sup>-3</sup>          |                        |

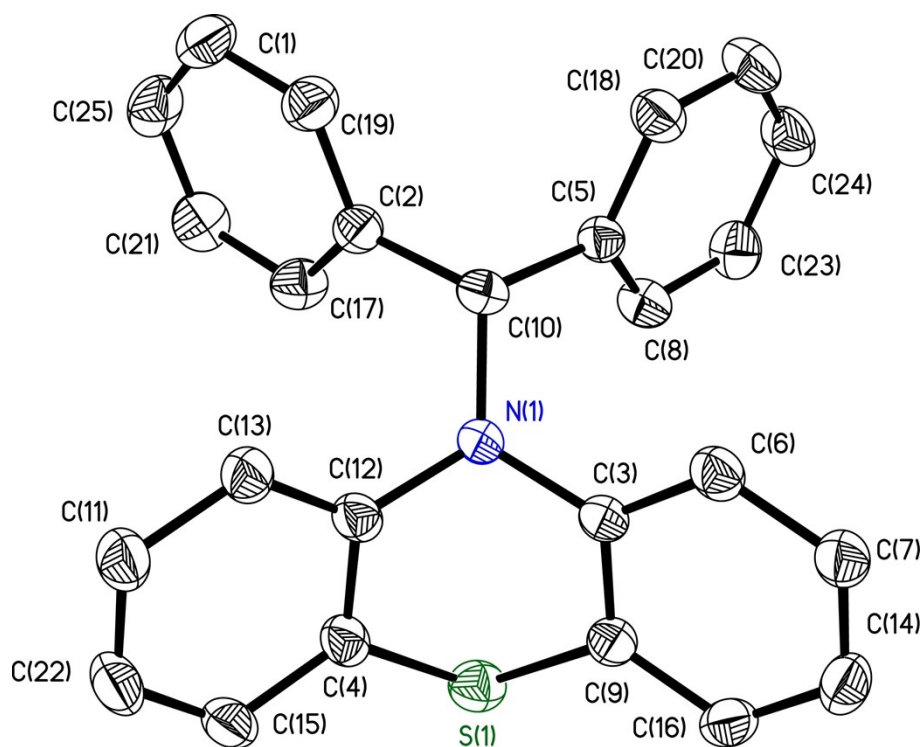

**Figure S15.** Molecular Structure of **4d** (CCDC 2194930) with thermal ellipsoids presented at a 50% probability level. All hydrogen atoms have been omitted for clarity. Selected bond lengths (Å): S(1)—C(9), 1.766(5); S(1)—C(4), 1.769(5); N(1)—C(3), 1.431(5); N(1)—C(12), 1.434(5); N(1)—C(10), 1.468(5); C(2)—C(17), 1.378(6); C(2)—C(19), 1.386(6); C(2)—C(10), 1.518(6); C(3)—C(6), 1.388(6); C(3)—C(9), 1.395(6); Bond angles (deg): C(9)—S(1)—C(4), 97.3(2); C(3)—N(1)—C(12), 113.1(3); C(3)—N(1)—C(10), 119.6(3); C(12)—N(1)—C(10), 120.3(3); C(17)—C(2)—C(10), 122.6(4); C(19)—C(2)—C(10), 118.9(4); N(1)—C(10)—C(2), 113.2(3); N(1)—C(10)—C(5), 110.1(3); C(2)—C(10)—C(5), 107.1(3).

**Table S3.** Crystallographic experimental details for compound **4d** (CCDC 2194930).

|                                   |                                                                                                                       |
|-----------------------------------|-----------------------------------------------------------------------------------------------------------------------|
| Empirical formula                 | C <sub>25</sub> H <sub>19</sub> NS                                                                                    |
| Formula weight                    | 365.47                                                                                                                |
| Temperature                       | 293(2) K                                                                                                              |
| Wavelength                        | 0.71073 Å                                                                                                             |
| Crystal system, space group       | Monoclinic, P 21/c                                                                                                    |
| Unit cell dimensions              | a = 19.024(12) Å    alpha = 90 deg.<br>b = 6.265(4) Å    beta = 115.51(2) deg.<br>c = 17.503(13) Å    gamma = 90 deg. |
| Volume                            | 1883(2) Å <sup>3</sup>                                                                                                |
| Z, Calculated density             | 4, 1.289 Mg/m <sup>3</sup>                                                                                            |
| Absorption coefficient            | 0.181 mm <sup>-1</sup>                                                                                                |
| F(000)                            | 768                                                                                                                   |
| Crystal size                      | ? x ? x ? mm                                                                                                          |
| Theta range for data collection   | 2.328 to 26.021 deg.                                                                                                  |
| Limiting indices                  | -21 ≤ h ≤ 21, -7 ≤ k ≤ 7, -21 ≤ l ≤ 21                                                                                |
| Reflections collected /unique     | 11447 / 3602 [R(int) = 0.1274]                                                                                        |
| Completeness to theta = 25.242    | 98.20%                                                                                                                |
| Absorption correction             | None                                                                                                                  |
| Refinement method                 | Full-matrix least-squares on F <sup>2</sup>                                                                           |
| Data / restraints / par           | ameters    3602 / 0 / 245                                                                                             |
| Goodness-of-fit on F <sup>2</sup> | 1.047                                                                                                                 |
| Final R indices [I > 2σ(I)]       | R1 = 0.0854, wR2 = 0.1853                                                                                             |
| R indices (all data)              | R1 = 0.1791, wR2 = 0.2595                                                                                             |
| Extinction coefficient            | 0.210(15)                                                                                                             |
| Largest diff. peak and hole       | 0.874 and -0.939 e.Å <sup>-3</sup>                                                                                    |

## 5. $^1\text{H}$ NMR and $^{13}\text{C}$ NMR spectra

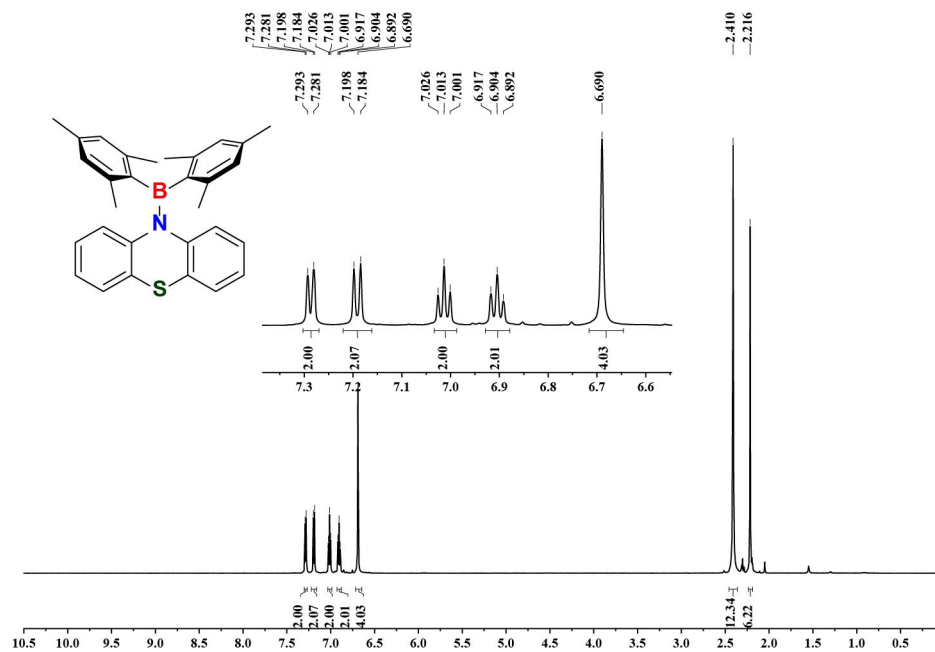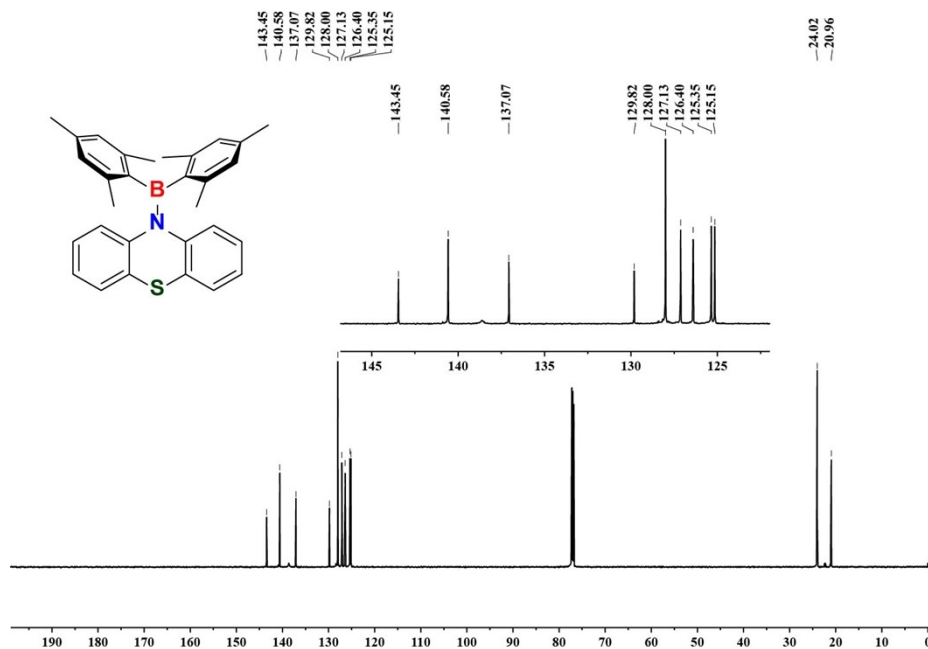

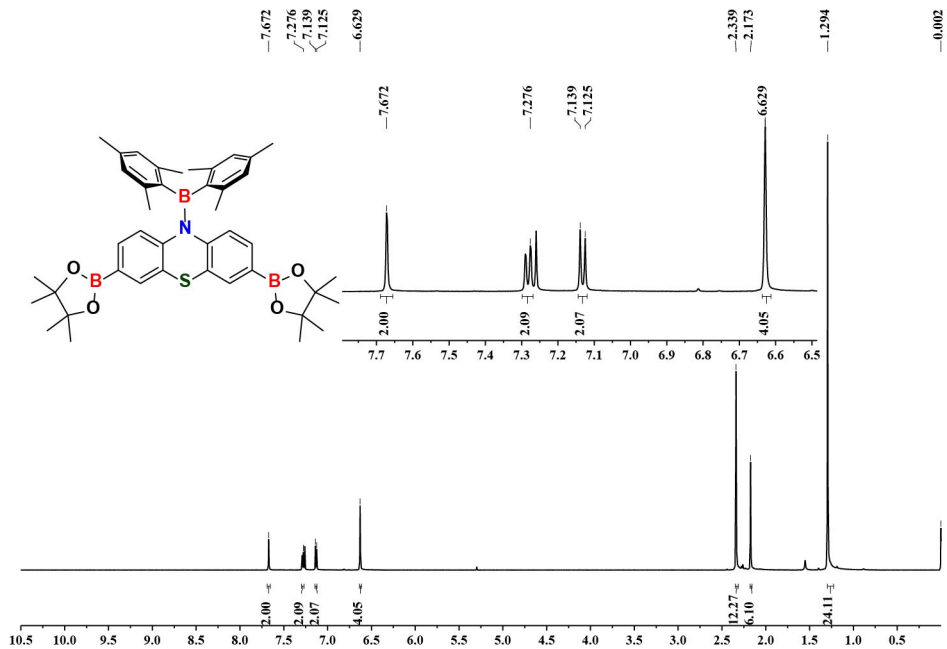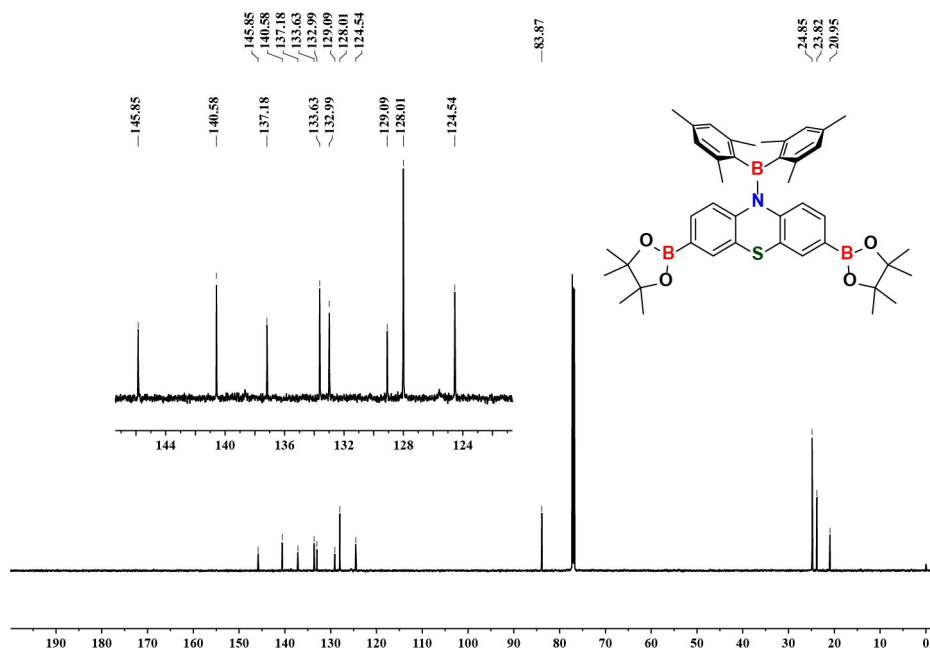

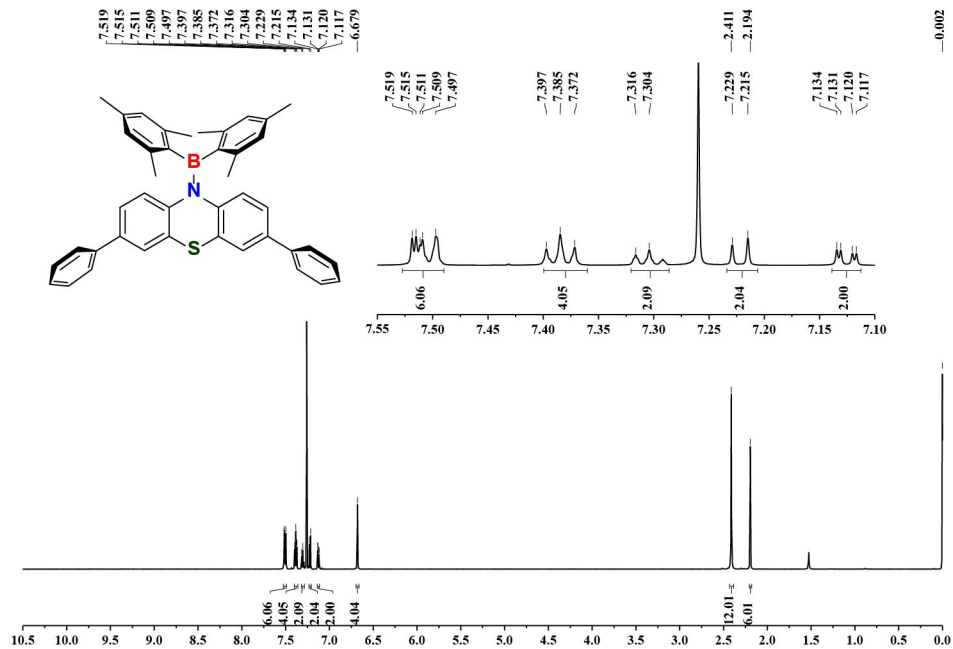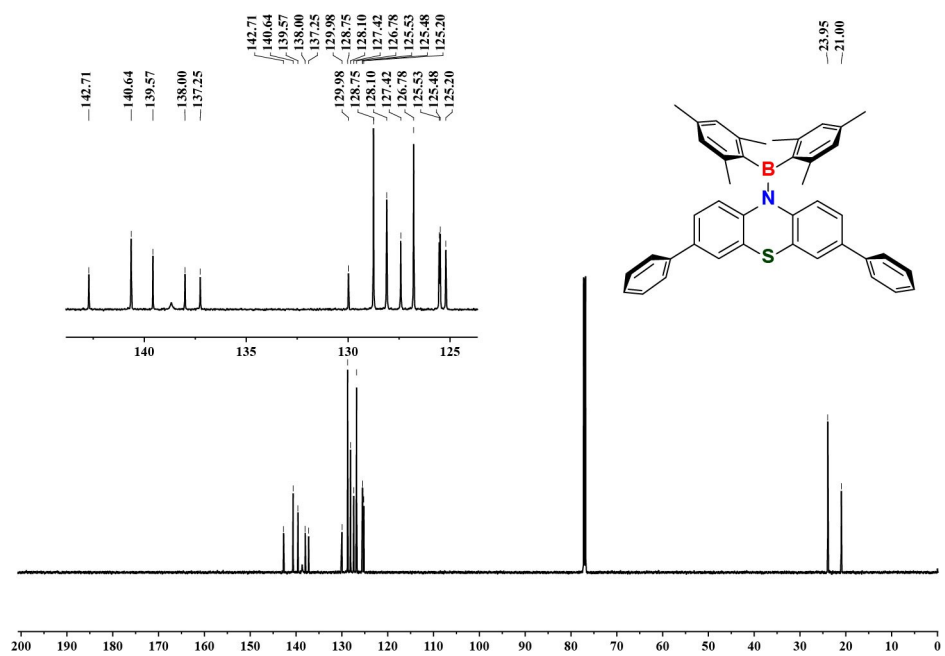



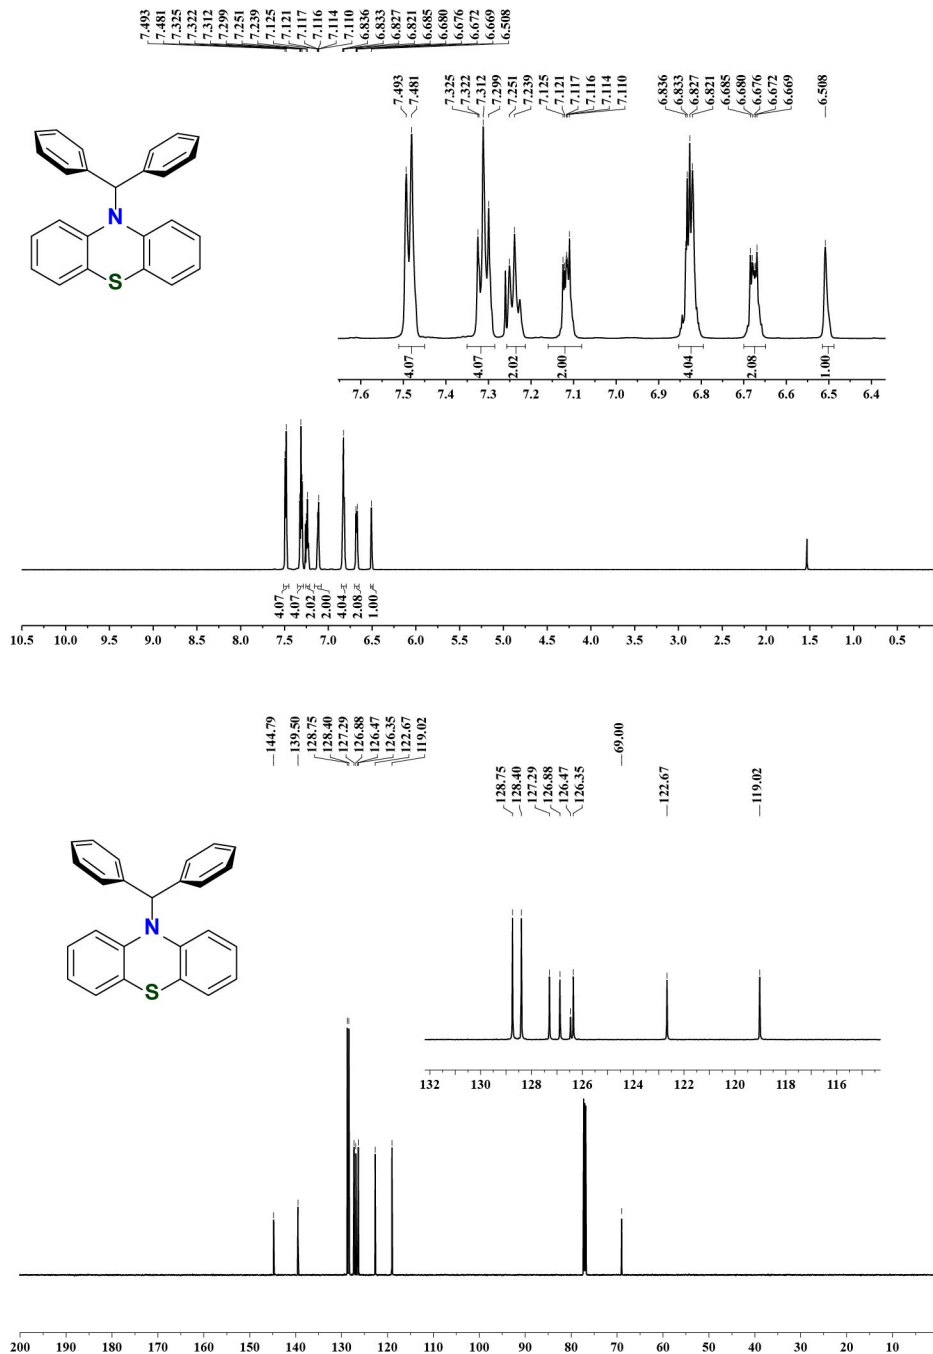

## 6. Reference

[1] Frisch, M. J.; Trucks, G. W.; Schlegel, H. B. Gaussian09, Revision A.01, Gaussian, Wallingford, Con, USA, **2009**.
